# Supplementary material for: Effect of discriminative plant-sugar feeding on the survival and fecundity of Anopheles gambiae
Source: Springer Nature journal article supplement (doi:10.1186/1475-2875-6-113), 2007-08-21
Supplement: 12936_2007_418_MOESM2_ESM.pdf [file 12936_2007_418_MOESM2_ESM.pdf]

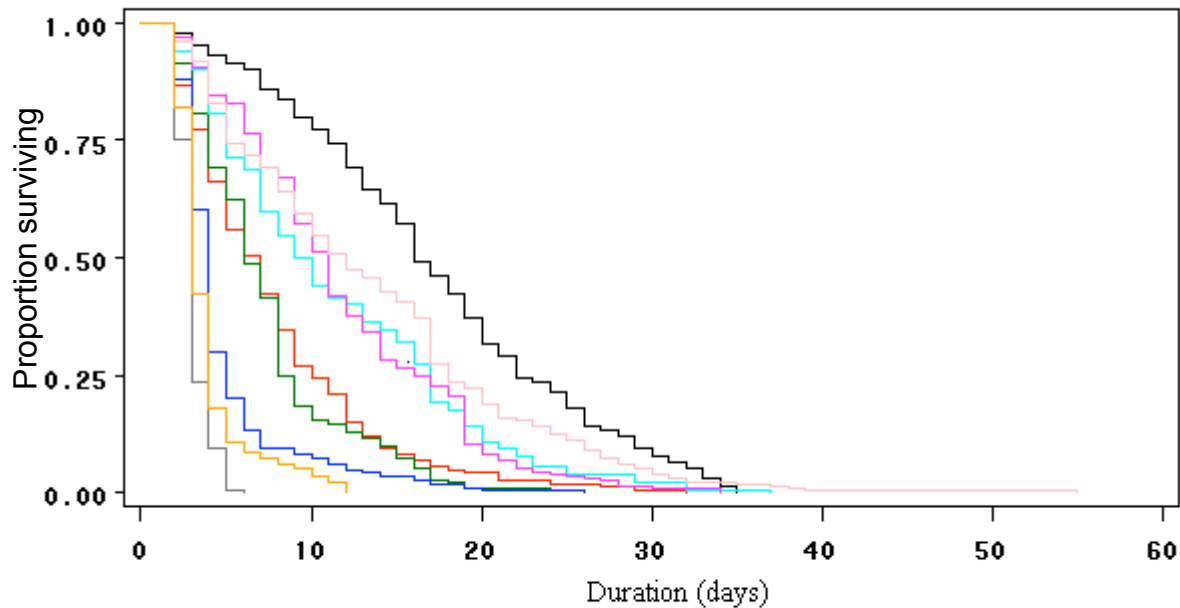

- |   |                                  |   |                    |   |                          |
|---|----------------------------------|---|--------------------|---|--------------------------|
| — | Glucose (positive control)       | — | <i>H. patens</i>   | — | <i>L. camara</i>         |
| — | <i>P. hysterothorus</i>          | — | <i>R. communis</i> | — | <i>S. didymobotrya</i>   |
| — | 2 <sup>nd</sup> negative control | — | <i>T. stans</i>    | — | Water (negative control) |
